# Supplementary material for: A novel 17 bp indel in the &lt;i&gt;SMAD3&lt;/i&gt; gene alters transcription level, contributing to phenotypic traits in Chinese cattle
Source: Copernicus journal article supplement (doi:10.5194/aab-59-151-2016), 2016-03-30
Supplement: Supplementary file 1 [file aab-59-151-2016-supplement.pdf]

Supplement of Arch. Anim. Breed., 59, 151–157, 2016  
<http://www.arch-anim-breed.net/59/151/2016/>  
doi:10.5194/aab-59-151-2016-supplement  
© Author(s) 2016. CC Attribution 3.0 License.

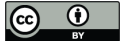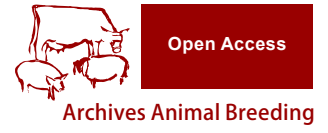

*Supplement of*

## **A novel 17 bp indel in the *SMAD3* gene alters transcription level, contributing to phenotypic traits in Chinese cattle**

**Tao Shi et al.**

*Correspondence to:* Hong Chen (chenhong1212@263.net)

The copyright of individual parts of the supplement might differ from the CC-BY 3.0 licence.

## Supplementary Material

**Table S1** Primers in bovine *SMAD3* for variations detection

| Name <sup>a</sup> | Primer sequences<br>(5'to3')                      | Position of amplicon<br>in NC_007308 <sup>b</sup> | Size<br>(bp) | T <sub>a</sub><br>( °C) | Location within gene                     |
|-------------------|---------------------------------------------------|---------------------------------------------------|--------------|-------------------------|------------------------------------------|
| P1                | F: CAAAGTTTGGCTGGGGGTTG<br>R:GAGGTGAAAAGCCAATGCGG | nt- 409 to 750                                    | 847          | 67.3                    | 5'UTR,Exon 1,<br>partial Intron 1        |
| P2                | F:TCACTGTCCGTTTCTGCTCC<br>R: GCCTTGCTATTTCCGCTTC  | nt 100225 to101019                                | 795          | 61.4                    | Exon 2, 3 and<br>partial Intron 1, 2, 3  |
| P3                | F: CCTTTCGGAGCCATCTAC<br>R: TCTTCCATCAGGGCATAACA  | nt 101364 to 102434                               | 1071         | 57.0                    | Exon 4 and<br>partial Intron 3, 4        |
| P4                | F:TGCGGGCTTGATTAGACG<br>R: GCCCACTTGTCAGCCGTA     | nt 105182 to 106585                               | 1404         | 62.5                    | Exon 5 and<br>partial Intron 4, 5        |
| P5                | F:CTTGAAGATGGCTCTGACCT<br>R: AAGGGTCTTCTCTACTGCT  | nt 114439 to 115116                               | 696          | 61.4                    | Exon 6 and<br>partial Intron 5, 6        |
| P6                | F:GCTGCTAGAGACCAGTCACC<br>R:TGAGACAGCAAGGCACAGAG  | nt 117001 to 1177415                              | 415          | 61.4                    | Exon 7 and<br>partial Intron 6, 7        |
| P7                | F: CCTCCCTATTGAAGTGGCG<br>R: ACTGCTGGCATCTCCTCC   | nt 119469 to 120312                               | 861          | 61.4                    | Exon 8 and<br>partial Intron 7, 8        |
| P8                | F: ACCTCCTTTCCTTCCTG<br>R: CTCTGGGTTTGCTTTCGT     | nt 122029 to 122531                               | 503          | 57.0                    | Exon 9 and<br>partial Intron 8, 9, 3'UTR |

Note: <sup>a</sup> P1, P2, P3, P4, P5, P6, P7, P8 were primer pairs for sequencing, covering all of exons and partial introns of *SMAD3* gene.

<sup>b</sup> Nucleotide + 1 is the transcription initiation site; the nucleotide 5' to +1 is numbered
